# Supplementary material for: Mycobacteria that cause tuberculosis have retained ancestrally acquired genes for the biosynthesis of chemically diverse terpene nucleosides
Source: PubMed Central journal article supplement (PMC11476799; doi:10.1371/journal.pbio.3002813), 2024-09-30

A

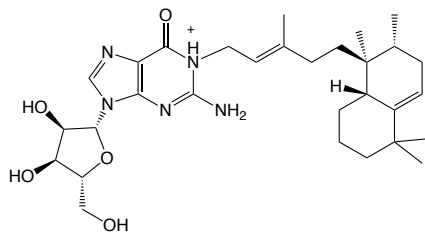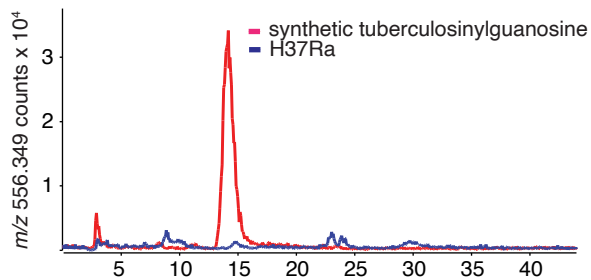

B

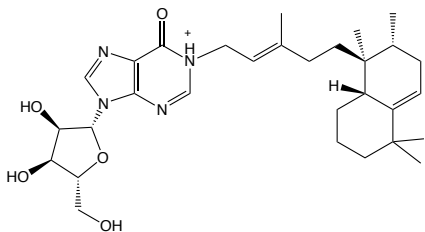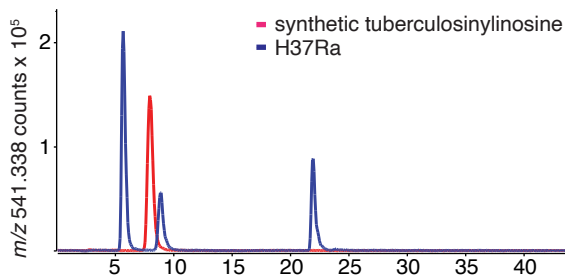

C

Negative mode  $[M+HCOO]^-$ 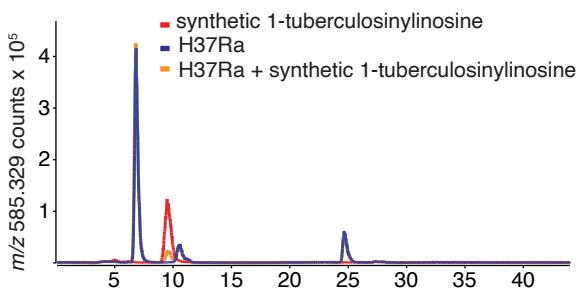

Supplement: pbio.3002813.s006.pdf [file pbio.3002813.s006.pdf]
