# Supplementary material for: Mycobacteria that cause tuberculosis have retained ancestrally acquired genes for the biosynthesis of chemically diverse terpene nucleosides
Source: PubMed Central journal article supplement (PMC11476799; doi:10.1371/journal.pbio.3002813), 2024-09-30
Supplement: pbio.3002813.s011.pdf [file pbio.3002813.s011.pdf]

| putative metabolite | log <sub>2</sub> -fold change |                |                       |         | mean level | F-statistic | p-value   | adjusted p-value |
|---------------------|-------------------------------|----------------|-----------------------|---------|------------|-------------|-----------|------------------|
|                     | major allele                  |                | G307S vs major allele |         |            |             |           |                  |
|                     | 1 vs 400µM B6                 | -/+ methionine | 400µM B6              | 1µM B6  |            |             |           |                  |
| glutathione         | -11.39                        | -5.919         | -6.559                | 6.179   | 21.89      | 295.1       | 3.536e-21 | 9.69e-19         |
| methylthioadenosine | 0                             | -6.733         | 0                     | 0       | 31.29      | 147.6       | 2.053e-17 | 2.812e-15        |
| tyrosine            | -3.689                        | -4.534         | -1.272                | 1.856   | 27.79      | 107.8       | 9.665e-16 | 8.827e-14        |
| valine              | -5.969                        | -5.662         | -1.178                | 2.623   | 23.38      | 75.5        | 6.978e-14 | 3.824e-12        |
| methionine          | 12.15                         | -2.47          | 8.206                 | -6.803  | 22.4       | 69.64       | 1.81e-13  | 8.267e-12        |
| homocystine         | 6.222                         | -0.6474        | 2.394                 | -2.293  | 19.93      | 52.12       | 5.204e-12 | 1.584e-10        |
| lysine              | 1.54                          | 2.15           | 0.6601                | -0.6601 | 31.85      | 47.05       | 1.66e-11  | 3.789e-10        |
| (iso)leucine        | 7.486                         | 4.515          | 5.554                 | -4.001  | 27.6       | 40.96       | 7.804e-11 | 1.645e-09        |
| phenylalanine       | -2.838                        | -4.281         | -0.4811               | 1.13    | 26.17      | 30.66       | 1.778e-09 | 3.48e-08         |
| sam                 | 3.29                          | -4.603         | 1.36                  | -1.873  | 20.51      | 28.35       | 4.026e-09 | 6.894e-08        |
