# Supplementary material for: Mycobacteria that cause tuberculosis have retained ancestrally acquired genes for the biosynthesis of chemically diverse terpene nucleosides
Source: PubMed Central journal article supplement (PMC11476799; doi:10.1371/journal.pbio.3002813), 2024-09-30
Supplement: pbio.3002813.s012.pdf [file pbio.3002813.s012.pdf]

| gene                |               |             | <i>Rv3376</i>                   |         |         |         |         | <i>Rv3377c</i> |         |         |         |         |         |         |         |         |         | <i>Rv3378c</i> |         |         |         |         |
|---------------------|---------------|-------------|---------------------------------|---------|---------|---------|---------|----------------|---------|---------|---------|---------|---------|---------|---------|---------|---------|----------------|---------|---------|---------|---------|
| coordinate (H37Rv)  |               |             | 3790459                         | 3790491 | 3790652 | 3790688 | 3790694 | 3790929        | 3791117 | 3791129 | 3791133 | 3791136 | 3791195 | 3791261 | 3791576 | 3791598 | 3792135 | 3792263        | 3792523 | 3792712 | 3792840 | 3793102 |
| mutation            |               |             | dupT                            | G>T     | C>T     | T>A     | G>T     | T>C            | G>A     | T>C     | C>X     | T>C     | G>T     | A>C     | G>T     | T>C     | T>C     | C>A            | T>G     | CC>TT   | A>G     | C>A     |
| change              |               |             | X                               | V>F     | T>M     | V>D     | G>C     | K>E            | T>M     | X       | X15     | I>V     | T>K     | I>S     | P>H     | T>A     | M>V     | G>V            | I>L     | X       | V>A     | D>Y     |
| MTb complex species | total genomes | synteny (%) | Number of genomes with mutation |         |         |         |         |                |         |         |         |         |         |         |         |         |         |                |         |         |         |         |
| <i>africanum</i>    | 34            | 101         | 2                               |         | 4       |         | 4       |                | 1       |         |         |         | 1       |         | 1       |         |         | 29             |         |         |         | 1       |
| <i>bovis</i>        | 130           | 99          |                                 |         |         |         |         |                |         |         | 129     |         |         | 1       |         | 1       |         |                | 1       |         |         | 50      |
| <i>orygis</i>       | 2             | 101         |                                 |         |         |         |         | 1              |         |         |         |         |         |         |         |         |         |                |         |         |         |         |
| <i>caprae</i>       | 4             | 100         |                                 |         |         |         |         |                |         | 4       | 4       |         |         |         |         |         |         |                |         |         |         |         |
| <i>microti</i>      | 6             | 100         |                                 |         |         | 6       |         |                | 1       |         |         |         |         |         |         |         |         |                |         |         |         |         |
| <i>pinnipedii</i>   | 3             | 100         |                                 | 3       |         | 3       |         |                |         |         |         |         |         |         |         |         |         |                |         |         |         |         |
| <i>munji</i>        | 1             | 99          |                                 |         |         |         |         |                |         |         |         |         |         |         |         | 1       |         |                |         | 1       |         |         |
| <i>canetti</i>      | 14            | 97          | 100% coverage; 99% identity     |         |         |         |         |                |         |         |         |         |         |         |         |         |         |                |         |         |         |         |
| <i>lacus</i>        | 2             | 43          | 97% coverage; 77% identity      |         |         |         |         |                |         |         |         |         |         |         |         |         |         |                |         |         |         |         |
| <i>decipiens</i>    | 1             | 52          | 97% coverage; 79% identity      |         |         |         |         |                |         |         |         |         |         |         |         |         |         |                |         |         |         |         |
