# Supplementary material for: Mycobacteria that cause tuberculosis have retained ancestrally acquired genes for the biosynthesis of chemically diverse terpene nucleosides
Source: PubMed Central journal article supplement (PMC11476799; doi:10.1371/journal.pbio.3002813), 2024-09-30

S1 Fig: Uncropped images of ethidium bromide stained DNA on agarose gels

B

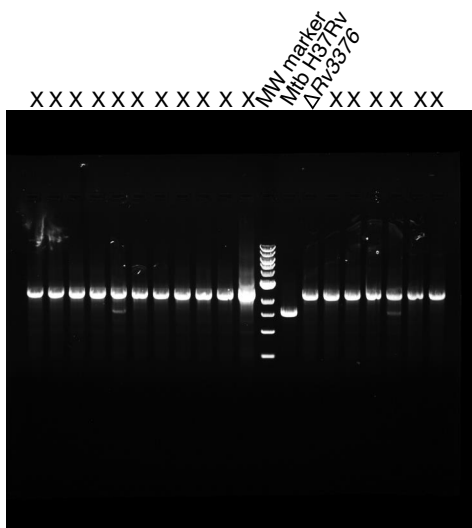

D

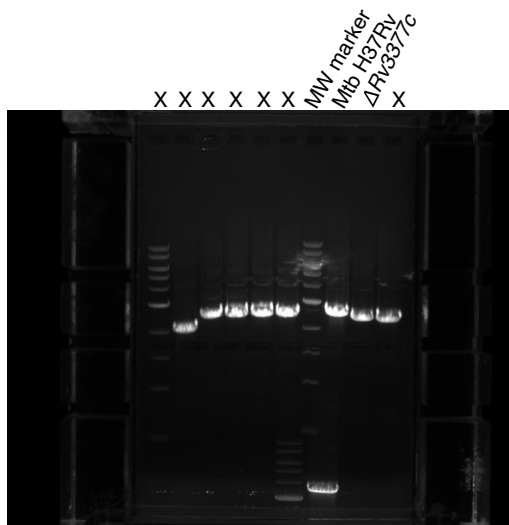

F

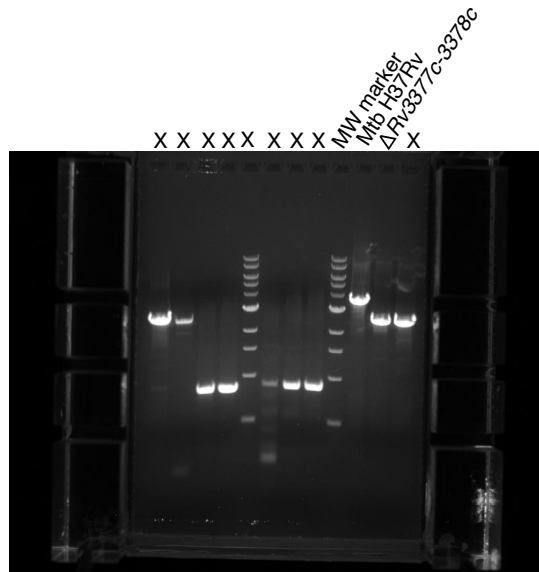

Supplement: pbio.3002813.s017.pdf [file pbio.3002813.s017.pdf]
